# Supplementary material
Source: Springer Nature journal article supplement (https://www.springermedizin.de/resource/supplementary/12958_2011_979_MOESM2_ESM.pdf/9566486)

**EM normal****ES ovarian****ES peritoneal****ES deep****HE**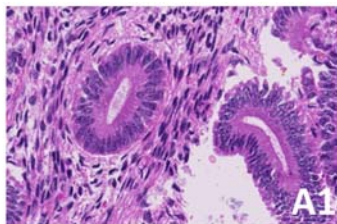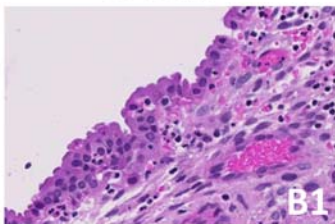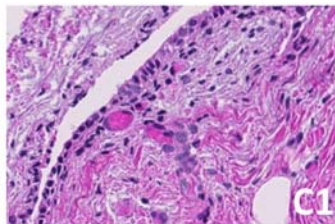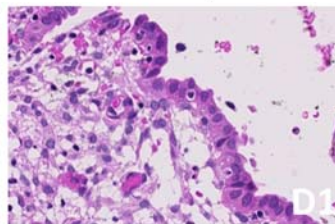**GPER**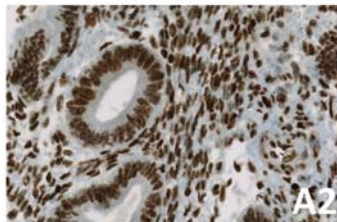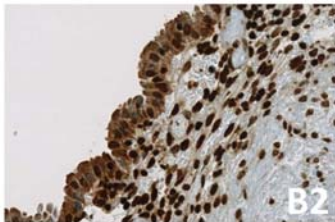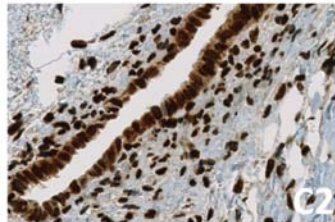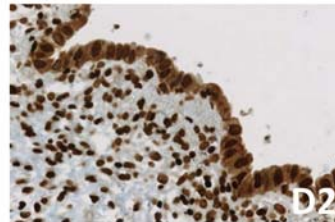**ER-alpha**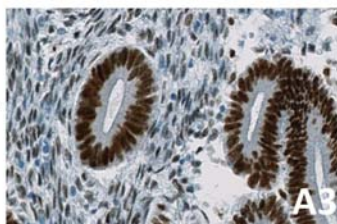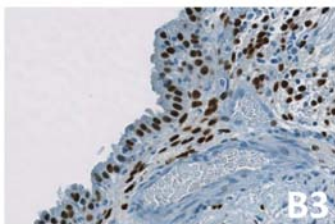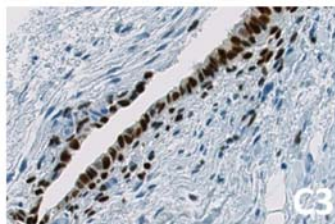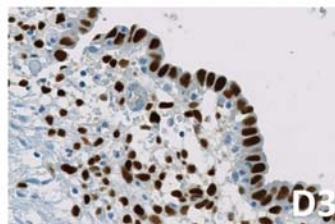**ER-beta**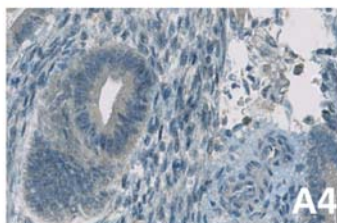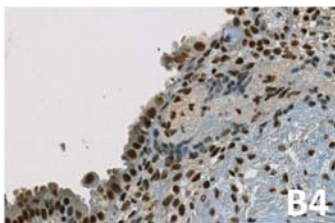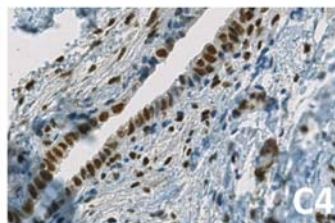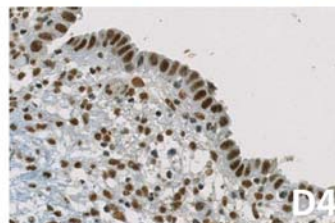**PR**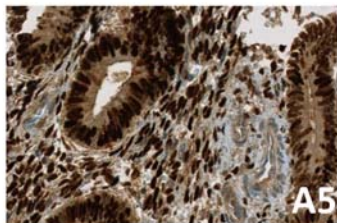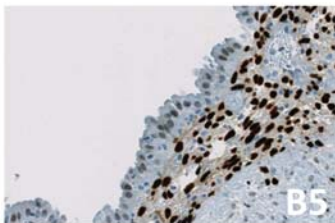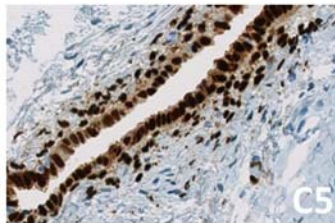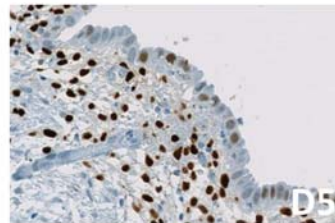

Supplement: MOESM2 [file 9566486]
